# Supplementary material for: The DNA repair function of CUX1 contributes to radioresistance
Source: PubMed Central journal article supplement (PMC5386666; doi:10.18632/oncotarget.14875), 2017-01-28
Supplement: oncotarget-08-19021-s001.pdf [file oncotarget-08-19021-s001.pdf]

## The DNA repair function of *CUX1* contributes to radioresistance

### Supplementary Materials

**Supplementary Table 1: Primer sequences used for PCR amplification**

|              | Primers for PCR amplification                             |
|--------------|-----------------------------------------------------------|
| <i>APE1</i>  | (F) GATTGGGTAAAGGAAGAAGC<br>(R) TCAAATTCAGCCACAATCAC      |
| <i>OGG1</i>  | (F) GTTCCTCCAACAACAACAT<br>(R) AGATGCAGTCAGCCACCTTGG      |
| <i>PARP1</i> | (F) CAACTTTGCTGGGATCCTGT<br>(R) TGTTTCCAAGGGCAACTTCT      |
| <i>POLβ</i>  | (F) AGACTCTCAACGGGGGAATCAC<br>(R) GCAGATGGACCAATGCCACTAAC |
| <i>XRCC1</i> | (F) CAGACCAAAACCAAGCCCACTC<br>(R) TCACTGTCCGTGTTCTCATCCG  |
| <i>GAPDH</i> | (F) ACCACAGTCCATGGCATCAC<br>(R) TCCACCACCCTGTTGCTGTA      |

**Supplementary Movie 1: GFP-p200 CUX1 is rapidly recruited to sites of DNA damage upon 351/364 nm laser microirradiation.** See Supplementary\_Movie\_1

**Supplementary Movie 2: p200 CUX1-GFP is rapidly recruited to sites of DNA damage upon 405 nm laser microirradiation.** See Supplementary\_Movie\_2

**Supplementary Movie 3: Cut domains are rapidly recruited to sites of DNA damage upon 405 nm laser microirradiation.** See Supplementary\_Movie\_3

**Supplementary Movie 4: OGG1-GFP is recruited to sites of DNA damage upon 405 nm laser microirradiation.** See Supplementary\_Movie\_4

**Supplementary Movie 5: Ku-mcherry is recruited to sites of DNA damage upon 405 nm laser microirradiation.** See Supplementary\_Movie\_5
